# Supplementary material
Source: publisher figshare collection journal article supplement (https://springernature.figshare.com/ndownloader/files/17414909)
Supplement: Supplementary file [file 17414909]

**Additional File 1. Immunogold labeling of  
sonicated samples for PSD-95 and SynGAP**

**PSD-95**

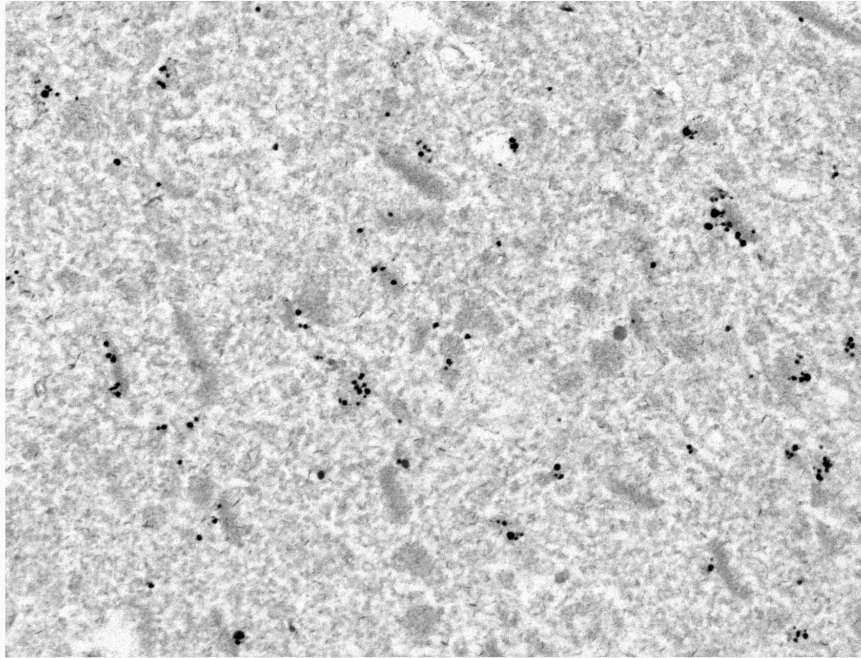

**SynGAP**

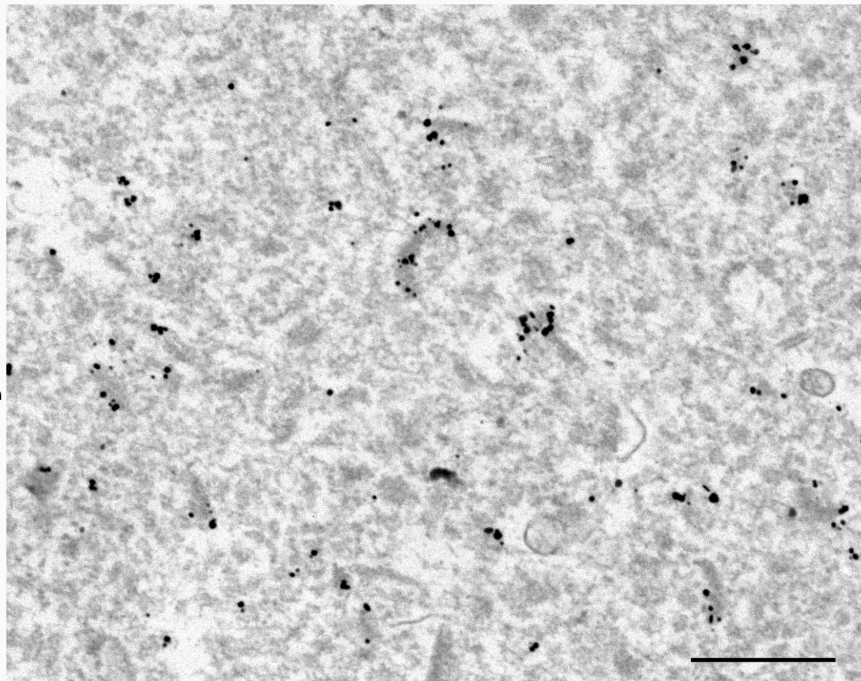

Images were taken from the middle of pellets with  
PSD fragments of different sizes. Labeling intensity  
is heterogeneous. Scale bar = 0.5  $\mu\text{m}$ .
